# Supplementary material for: miRNA Biogenesis Enzyme Drosha Is Required for Vascular Smooth Muscle Cell Survival
Source: PubMed Central journal article supplement (PMC3630177; doi:10.1371/journal.pone.0060888), 2013-04-18

Figure S4

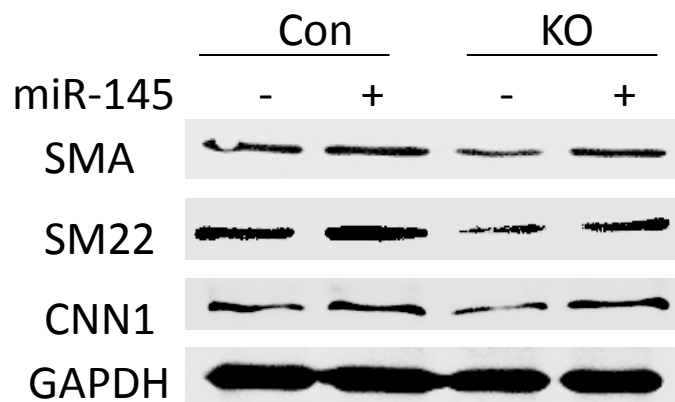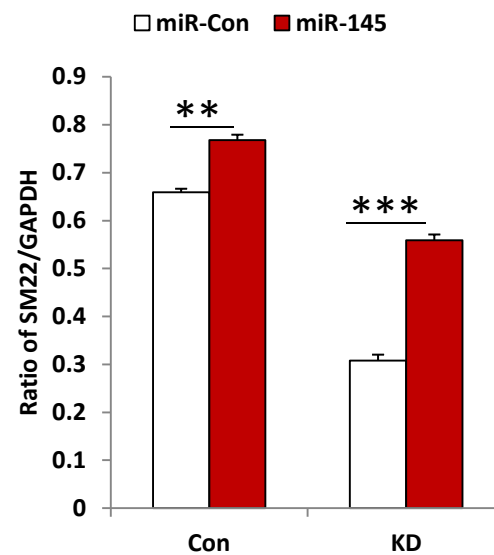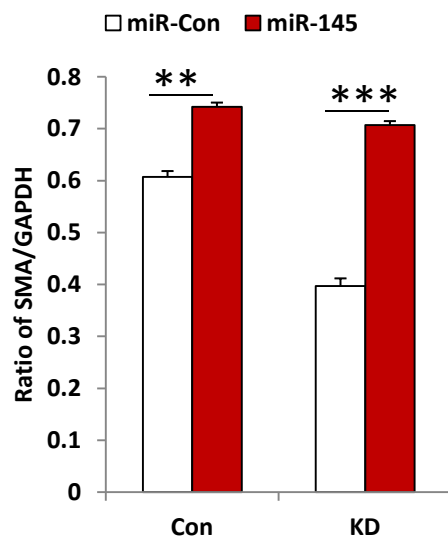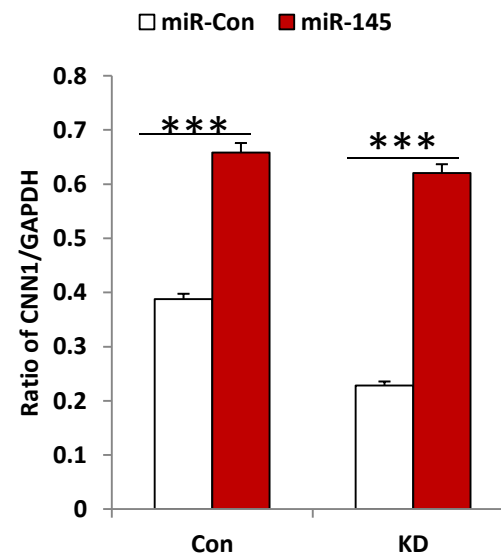

Supplement: pone.0060888.s004.pdf [file pone.0060888.s004.pdf]
