# Supplementary material for: miRNA Biogenesis Enzyme Drosha Is Required for Vascular Smooth Muscle Cell Survival
Source: PubMed Central journal article supplement (PMC3630177; doi:10.1371/journal.pone.0060888), 2013-04-18
Supplement: pone.0060888.s008.pdf [file pone.0060888.s008.pdf]

**Table S2: miRNA expression profiles in the umbilical arteries of Drosha cKO and control**

| ProbeSet Name      | cKO_(miRNA-1_0) | p-value (cKO_(miRNA-1_0)) | Control_(miRNA-1_0) | p-value (Control_(miRNA-1_0)) |
|--------------------|-----------------|---------------------------|---------------------|-------------------------------|
| mmu-let-7g_st      | 176.0992        | 0.00552743                | 108.186             | 0.008013108                   |
| mmu-let-7i_st      | 1010.36         | 6.88E-06                  | 760.2106            | 1.17E-05                      |
| mmu-miR-15b_st     | 365.4714        | 0.000344788               | 256.6574            | 0.001205841                   |
| mmu-miR-23b_st     | 2022.741        | 2.22E-06                  | 2218.135            | 2.05E-08                      |
| mmu-miR-27b_st     | 191.2281        | 0.007744181               | 368.1843            | 0.000274656                   |
| mmu-miR-30a_st     | 173.414         | 0.007182509               | 415.7555            | 6.81E-05                      |
| mmu-miR-30b_st     | 148.3776        | 0.007843355               | 303.7594            | 0.000730234                   |
| mmu-miR-99a_st     | 276.2535        | 0.002874706               | 697.3185            | 5.60E-05                      |
| mmu-miR-99b_st     | 2708.069        | 2.05E-08                  | 3522.612            | 2.05E-08                      |
| mmu-miR-125a-5p_st | 1612.755        | 1.04E-06                  | 1299.439            | 3.83E-08                      |
| mmu-miR-125b-5p_st | 1675.037        | 3.83E-08                  | 1952.411            | 1.04E-06                      |
| mmu-miR-126-3p_st  | 704.0233        | 9.69E-05                  | 944.9069            | 7.27E-07                      |
| mmu-miR-127_st     | 5350.058        | 2.05E-08                  | 7316.074            | 2.05E-08                      |
| mmu-miR-130a_st    | 1028.398        | 7.73E-06                  | 2556.891            | 2.05E-08                      |
| mmu-miR-134_st     | 1808.61         | 7.27E-07                  | 1362.063            | 9.37E-07                      |
| mmu-miR-138_st     | 153.2999        | 0.02328095                | 389.842             | 0.000920161                   |
| mmu-miR-141_st     | 98.30212        | 0.03511543                | 317.4154            | 0.000416083                   |
| mmu-miR-145_st     | 1801.537        | 1.04E-06                  | 4195.622            | 2.05E-08                      |
| mmu-miR-151-5p_st  | 514.0986        | 7.33E-05                  | 515.8688            | 0.000140257                   |
| mmu-miR-151-3p_st  | 120.7621        | 0.02478577                | 109.9179            | 0.02201726                    |
| mmu-miR-152_st     | 1135.005        | 5.00E-05                  | 1469.891            | 2.47E-07                      |
| mmu-miR-154_st     | 134.6969        | 0.04270166                | 254.9351            | 0.003405793                   |
| mmu-miR-181a_st    | 514.48          | 7.33E-05                  | 977.9589            | 1.17E-05                      |
| mmu-miR-182_st     | 1436.464        | 7.27E-07                  | 1286.858            | 2.05E-08                      |
| mmu-miR-183_st     | 119.537         | 0.02550048                | 111.6547            | 0.01621607                    |
| mmu-miR-185_st     | 1104.242        | 5.91E-06                  | 696.0083            | 4.48E-05                      |
| mmu-miR-24_st      | 3954.94         | 2.05E-08                  | 3916.56             | 2.05E-08                      |
| mmu-miR-191_st     | 3036.339        | 2.47E-07                  | 2497.278            | 2.05E-08                      |
| mmu-miR-194_st     | 1949.25         | 2.80E-06                  | 1714.731            | 3.83E-08                      |
| mmu-miR-199a-5p_st | 625.414         | 4.21E-05                  | 1890.727            | 2.05E-08                      |
| mmu-miR-199a-3p_st | 1434.139        | 2.05E-08                  | 1238.452            | 1.04E-06                      |

|                   |          |             |          |             |
|-------------------|----------|-------------|----------|-------------|
| mmu-miR-200b_st   | 208.6181 | 0.004736582 | 162.1406 | 0.006250085 |
| mmu-miR-203_st    | 122.2113 | 0.01377449  | 325.602  | 0.000333534 |
| mmu-miR-143_st    | 1178.853 | 5.00E-05    | 3386.285 | 2.05E-08    |
| mmu-miR-290-5p_st | 623.6066 | 0.000184229 | 454.0496 | 6.90E-05    |
| mmu-miR-292-5p_st | 303.058  | 0.002124524 | 147.3061 | 0.0100027   |
| mmu-miR-292-3p_st | 862.7097 | 1.93E-05    | 399.0946 | 0.000124184 |
| mmu-miR-293_st    | 383.4983 | 0.000317094 | 313.4342 | 0.001079096 |
| mmu-miR-296-3p_st | 142.2623 | 0.02111623  | 615.8486 | 5.30E-06    |
| mmu-miR-298_st    | 898.5653 | 2.96E-05    | 820.9673 | 3.50E-07    |
| mmu-miR-299_st    | 159.852  | 0.00633913  | 322.4022 | 0.001154355 |
| mmu-miR-300_st    | 575.5774 | 6.76E-05    | 1086.295 | 8.56E-06    |
| mmu-let-7d_st     | 2384.941 | 2.05E-08    | 2530.074 | 2.05E-08    |
| mmu-miR-106a_st   | 868.4946 | 9.61E-06    | 1243.282 | 4.23E-06    |
| mmu-miR-106b_st   | 619.6028 | 2.21E-05    | 1363.812 | 1.04E-06    |
| mmu-miR-130b_st   | 423.6593 | 0.000521098 | 1628.115 | 1.33E-07    |
| mmu-miR-19b_st    | 761.619  | 6.82E-06    | 1503.612 | 7.27E-07    |
| mmu-miR-30c_st    | 424.353  | 0.000337986 | 540.5021 | 1.16E-05    |
| mmu-miR-30d_st    | 331.5821 | 0.000527039 | 297.0122 | 0.001036446 |
| mmu-miR-192_st    | 512.6977 | 0.000254757 | 516.5609 | 1.65E-05    |
| mmu-miR-200a_st   | 138.6504 | 0.01235516  | 292.858  | 0.000683212 |
| mmu-let-7a_st     | 1485.854 | 6.02E-06    | 851.3195 | 5.08E-07    |
| mmu-let-7b_st     | 1028.615 | 6.76E-05    | 1146.523 | 2.47E-07    |
| mmu-let-7c_st     | 2462.541 | 2.05E-08    | 2397.673 | 2.05E-08    |
| mmu-let-7e_st     | 3434.265 | 2.05E-08    | 3430.966 | 2.05E-08    |
| mmu-miR-16_st     | 3501.497 | 2.05E-08    | 4067.921 | 2.05E-08    |
| mmu-miR-18a_st    | 467.0322 | 0.000377674 | 1761.703 | 7.15E-08    |
| mmu-miR-20a_st    | 1518.645 | 2.05E-08    | 2584.058 | 2.05E-08    |
| mmu-miR-22_st     | 1564.753 | 6.24E-06    | 1364.305 | 1.33E-07    |
| mmu-miR-23a_st    | 2977.627 | 7.15E-08    | 1622.544 | 1.33E-07    |
| mmu-miR-26a_st    | 5343.014 | 2.05E-08    | 4759.583 | 2.05E-08    |
| mmu-miR-27a_st    | 478.8503 | 7.33E-05    | 737.3399 | 2.00E-05    |
| mmu-miR-31_st     | 1017.54  | 7.31E-06    | 1222.366 | 3.83E-08    |
| mmu-miR-92a_st    | 898.1454 | 1.00E-05    | 978.5997 | 1.91E-07    |

|                   |          |             |          |             |
|-------------------|----------|-------------|----------|-------------|
| mmu-miR-93_st     | 1421.174 | 1.04E-06    | 2119.031 | 2.05E-08    |
| mmu-miR-34a_st    | 139.0831 | 0.001535555 | 469.9535 | 0.00034695  |
| mmu-miR-103_st    | 4095.697 | 2.05E-08    | 4864.242 | 2.05E-08    |
| mmu-miR-324-5p_st | 402.6872 | 0.000193812 | 607.2008 | 5.42E-05    |
| mmu-miR-329_st    | 574.9465 | 6.42E-05    | 316.3927 | 0.00073442  |
| mmu-miR-337-5p_st | 747.5455 | 1.61E-05    | 856.6932 | 7.51E-07    |
| mmu-miR-341_st    | 55.53144 | 0.02865593  | 192.4959 | 0.00368462  |
| mmu-miR-342-5p_st | 107.2879 | 0.04094442  | 81.7449  | 0.03521013  |
| mmu-miR-342-3p_st | 898.1776 | 7.36E-06    | 1010.131 | 2.47E-07    |
| mmu-miR-345-5p_st | 79.5938  | 0.03964012  | 291.0197 | 0.002388124 |
| mmu-miR-351_st    | 1474.997 | 2.93E-08    | 1939.38  | 2.93E-08    |
| mmu-miR-107_st    | 3472.073 | 2.05E-08    | 3422.32  | 2.05E-08    |
| mmu-miR-17_st     | 2474.406 | 2.05E-08    | 3905.973 | 2.05E-08    |
| mmu-miR-25_st     | 255.415  | 0.001620762 | 322.8605 | 0.001995062 |
| mmu-miR-28_st     | 186.9097 | 0.008141229 | 228.7461 | 0.002471312 |
| mmu-miR-100_st    | 214.3012 | 0.002836205 | 346.8808 | 0.000786766 |
| mmu-miR-139-5p_st | 95.91883 | 0.04319737  | 87.81985 | 0.05308421  |
| mmu-miR-200c_st   | 3276.96  | 2.05E-08    | 2323.351 | 2.05E-08    |
| mmu-miR-210_st    | 1013.254 | 4.57E-07    | 1245.449 | 2.47E-07    |
| mmu-miR-214_st    | 3163.283 | 2.05E-08    | 3715.81  | 2.05E-08    |
| mmu-miR-320_st    | 612.557  | 5.98E-05    | 398.537  | 0.000292324 |
| mmu-miR-199b_st   | 1387.567 | 2.05E-08    | 1095.811 | 1.73E-06    |
| mmu-miR-181b_st   | 461.2577 | 0.00010566  | 1142.41  | 7.31E-06    |
| mmu-miR-181c_st   | 80.37236 | 0.01256541  | 161.8151 | 0.000861621 |
| mmu-miR-361_st    | 667.2245 | 0.000151122 | 645.0219 | 8.26E-06    |
| mmu-miR-362-5p_st | 151.5156 | 0.005778691 | 290.016  | 0.001683965 |
| mmu-miR-376a_st   | 369.6392 | 0.00033502  | 418.0526 | 0.000210077 |
| mmu-miR-378_st    | 394.854  | 0.000329566 | 527.1481 | 0.000140257 |
| mmu-miR-379_st    | 2189.631 | 2.22E-06    | 2352.588 | 2.05E-08    |
| mmu-miR-380-5p_st | 187.2351 | 0.002387535 | 148.0005 | 0.01516094  |
| mmu-miR-382_st    | 1771.454 | 3.83E-08    | 1011.602 | 1.17E-05    |
| mmu-miR-335-5p_st | 195.2896 | 0.002027167 | 95.47771 | 0.02941277  |
| mmu-miR-409-5p_st | 543.0111 | 6.65E-05    | 593.4643 | 8.62E-05    |

|                    |          |             |          |             |
|--------------------|----------|-------------|----------|-------------|
| mmu-miR-409-3p_st  | 1748.091 | 1.04E-06    | 1366.791 | 2.05E-08    |
| mmu-miR-410_st     | 120.6222 | 0.02190318  | 247.6609 | 0.001614586 |
| mmu-miR-376b_st    | 662.2132 | 4.68E-05    | 963.5573 | 1.03E-07    |
| mmu-miR-411_st     | 1099.795 | 8.06E-06    | 966.5773 | 7.27E-07    |
| mmu-miR-370_st     | 279.4746 | 0.003349749 | 408.2409 | 6.54E-05    |
| mmu-miR-425_st     | 280.6487 | 0.001040226 | 377.0183 | 0.000382472 |
| mmu-miR-431_st     | 1899.862 | 1.04E-06    | 2178.567 | 2.05E-08    |
| mmu-miR-433_st     | 1287.999 | 1.04E-06    | 1124.765 | 7.15E-08    |
| mmu-miR-434-5p_st  | 136.725  | 0.0264323   | 476.4447 | 0.000259898 |
| mmu-miR-434-3p_st  | 812.6711 | 0.000107446 | 497.3513 | 4.47E-05    |
| mmu-miR-429_st     | 347.1818 | 0.000395545 | 393.5388 | 0.000234836 |
| mmu-miR-466a-3p_st | 371.8141 | 0.000448597 | 115.4837 | 0.01605521  |
| mmu-miR-467a_st    | 580.8785 | 0.000177952 | 426.7704 | 0.00015953  |
| mmu-miR-470_st     | 98.35048 | 0.03448163  | 76.37605 | 0.04389229  |
| mmu-miR-532-5p_st  | 455.8232 | 0.000134007 | 536.9868 | 1.69E-05    |
| mmu-miR-532-3p_st  | 142.0254 | 0.01458428  | 92.83827 | 0.03002472  |
| mmu-miR-483_st     | 146.987  | 0.02089787  | 224.1222 | 0.000547947 |
| mmu-miR-485_st     | 176.4058 | 0.00916348  | 252.5184 | 0.002108217 |
| mmu-miR-486_st     | 279.4654 | 0.001812119 | 182.983  | 0.002789673 |
| mmu-miR-540-3p_st  | 229.1801 | 0.004993885 | 282.9478 | 0.000908451 |
| mmu-miR-543_st     | 369.9621 | 0.000960249 | 229.024  | 0.002403343 |
| mmu-miR-541_st     | 3725.657 | 2.05E-08    | 3198.71  | 2.05E-08    |
| mmu-miR-542-5p_st  | 125.8756 | 0.02366951  | 189.4741 | 0.003193134 |
| mmu-miR-494_st     | 1207.161 | 3.23E-05    | 954.7923 | 5.08E-07    |
| mmu-miR-487b_st    | 619.5049 | 0.002694933 | 1063.641 | 5.08E-07    |
| mmu-miR-20b_st     | 155.0703 | 0.006899295 | 523.2933 | 9.67E-05    |
| mmu-miR-503_st     | 1631.03  | 1.04E-06    | 2705.819 | 2.05E-08    |
| mmu-miR-1224_st    | 415.3479 | 0.000192724 | 219.3755 | 0.00201043  |
| mmu-miR-301b_st    | 96.68697 | 0.02161252  | 171.29   | 0.00586197  |
| mmu-miR-744_st     | 156.9418 | 0.009162338 | 234.088  | 0.002340553 |
| mmu-miR-374_st     | 198.7983 | 0.02024719  | 44.43887 | 0.01663768  |
| mmu-miR-668_st     | 201.9133 | 0.0029128   | 407.2525 | 0.000131787 |
| mmu-miR-665_st     | 521.3515 | 0.000374237 | 1153.977 | 5.13E-06    |

|                      |          |             |          |             |
|----------------------|----------|-------------|----------|-------------|
| mmu-miR-667_st       | 378.5799 | 0.00017161  | 329.079  | 3.83E-05    |
| mmu-miR-762_st       | 1043.894 | 4.81E-05    | 224.7284 | 0.002088536 |
| mmu-miR-674_st       | 313.6601 | 0.000182608 | 708.9845 | 1.08E-05    |
| mmu-miR-423-5p_st    | 147.6743 | 0.02079581  | 222.5164 | 0.003402603 |
| mmu-miR-423-3p_st    | 108.8306 | 0.04076628  | 188.6387 | 0.004829697 |
| mmu-miR-495_st       | 273.7988 | 0.00181954  | 178.0226 | 0.008855181 |
| mmu-miR-685_st       | 119.6766 | 0.03019315  | 141.9177 | 0.01247926  |
| mmu-miR-690_st       | 5203.148 | 2.05E-08    | 12088.44 | 2.05E-08    |
| mmu-miR-691_st       | 69.42973 | 0.04862881  | 68.3583  | 0.05626863  |
| mmu-miR-669c_st      | 449.0959 | 0.000167846 | 175.5547 | 0.004695422 |
| mmu-miR-720_st       | 1521.539 | 1.04E-06    | 1391.025 | 2.05E-08    |
| mmu-miR-455_st       | 217.1344 | 0.003855135 | 387.7581 | 0.000432971 |
| mmu-miR-700_st       | 149.298  | 0.001293773 | 152.427  | 0.02286998  |
| mmu-miR-705_st       | 345.2979 | 0.000664432 | 217.9762 | 0.002838516 |
| mmu-miR-706_st       | 113.0049 | 0.02433994  | 106.501  | 0.01874034  |
| mmu-miR-708_st       | 163.3116 | 0.01267272  | 582.5062 | 9.34E-05    |
| mmu-miR-709_st       | 12205.73 | 2.05E-08    | 12117.14 | 2.05E-08    |
| mmu-miR-711_st       | 125.522  | 0.003255878 | 67.23685 | 0.01802134  |
| mmu-miR-714_st       | 127.6634 | 0.02489339  | 133.8224 | 0.01856779  |
| mmu-miR-500_st       | 372.0608 | 0.000374889 | 430.7616 | 0.00026246  |
| mmu-miR-501-3p_st    | 229.4004 | 0.006309438 | 252.439  | 0.000145025 |
| mmu-miR-721_st       | 85.11152 | 0.04064561  | 63.59674 | 0.02269715  |
| mmu-miR-652_st       | 373.7676 | 0.000599902 | 776.321  | 1.21E-06    |
| mmu-miR-615-3p_st    | 169.1551 | 0.01034936  | 279.8497 | 0.000926106 |
| mmu-miR-805_st       | 138.0535 | 0.01038346  | 124.6132 | 0.01245285  |
| mmu-miR-743a_st      | 118.519  | 0.02379829  | 163.0912 | 0.01020397  |
| mmu-miR-181d_st      | 130.6767 | 0.009649343 | 392.4883 | 0.000377493 |
| mmu-miR-193b_st      | 119.5665 | 0.0323408   | 349.024  | 0.000743636 |
| mmu-miR-421_st       | 141.2342 | 0.01857322  | 129.8846 | 0.002458914 |
| mmu-miR-466b-3p_st   | 228.6653 | 0.000259514 | 75.79465 | 0.004933881 |
| mmu-miR-466b-3-3p_st | 181.6    | 0.006064159 | 63.50697 | 0.01906401  |
| mmu-miR-466c-3p_st   | 358.9465 | 0.001309796 | 195.3029 | 0.000633791 |
| mmu-miR-466e-3p_st   | 306.9953 | 0.001785924 | 207.7937 | 0.000684763 |

|                      |          |             |          |             |
|----------------------|----------|-------------|----------|-------------|
| mmu-miR-466f-3p_st   | 374.0187 | 0.000267811 | 409.0064 | 0.000210077 |
| mmu-miR-466g_st      | 319.1982 | 0.000298034 | 173.231  | 0.00605024  |
| mmu-miR-574-5p_st    | 168.899  | 0.009371428 | 282.0978 | 0.001338107 |
| mmu-miR-574-3p_st    | 405.0378 | 0.00132885  | 338.9185 | 0.001162    |
| mmu-miR-669k_st      | 92.06111 | 0.05527418  | 145.4735 | 0.01898616  |
| mmu-miR-466i_st      | 269.6688 | 0.003132826 | 487.3692 | 3.81E-05    |
| mmu-miR-1187_st      | 130.0574 | 0.02819728  | 175.2188 | 0.007413736 |
| mmu-miR-467f_st      | 178.4973 | 0.009894461 | 197.8085 | 0.001718257 |
| mmu-miR-466j_st      | 85.69039 | 0.03647212  | 61.61609 | 0.04277109  |
| mmu-miR-1195_st      | 686.7464 | 3.29E-06    | 405.6268 | 0.000235709 |
| mmu-miR-1196_st      | 1162.916 | 5.00E-05    | 216.5091 | 0.003531655 |
| mmu-miR-99b-star_st  | 158.3648 | 0.01335267  | 277.8055 | 0.001239205 |
| mmu-miR-127-star_st  | 262.5748 | 0.001810704 | 444.5723 | 0.000203406 |
| mmu-miR-133a-star_st | 131.8002 | 0.004082429 | 51.63229 | 0.03811923  |
| mmu-miR-140-star_st  | 526.92   | 0.000182424 | 807.8068 | 1.38E-06    |
| mmu-miR-150-star_st  | 152.771  | 0.006581948 | 15.90168 | 0.03193578  |
| mmu-miR-193-star_st  | 77.78293 | 0.03497078  | 227.0359 | 0.003171266 |
| mmu-miR-200b-star_st | 134.5147 | 0.0188619   | 94.2515  | 0.04025601  |
| mmu-miR-299-star_st  | 121.646  | 0.0178301   | 191.1412 | 0.004914902 |
| mmu-miR-106b-star_st | 227.666  | 0.002870493 | 305.3827 | 0.000705435 |
| mmu-miR-15a-star_st  | 138.2123 | 0.02354804  | 174.6201 | 0.02182049  |
| mmu-miR-31-star_st   | 96.13125 | 0.01492252  | 84.18771 | 0.01215605  |
| mmu-miR-322-star_st  | 763.2585 | 9.83E-05    | 958.18   | 3.54E-07    |
| mmu-miR-17-star_st   | 287.3819 | 0.00271912  | 464.9563 | 0.000198981 |
| mmu-miR-28-star_st   | 131.6655 | 0.03680382  | 158.8175 | 0.008718664 |
| mmu-miR-199b-star_st | 122.4032 | 0.03223754  | 238.7198 | 0.00236388  |
| mmu-miR-7a-star_st   | 108.6409 | 0.01636171  | 62.78576 | 0.05925293  |
| mmu-miR-411-star_st  | 177.104  | 0.004445613 | 185.1082 | 0.002220236 |
| mmu-miR-467a-star_st | 340.381  | 0.000729368 | 117.8945 | 0.02738829  |
| mmu-miR-485-star_st  | 417.9315 | 0.000313934 | 333.6454 | 0.000532186 |
| mmu-miR-467b-star_st | 182.3038 | 0.005675805 | 167.0405 | 0.006992011 |
| mmu-miR-881-star_st  | 100.5125 | 0.02873719  | 96.03547 | 0.02589986  |
| mmu-miR-467d-star_st | 252.2046 | 0.001830111 | 134.7229 | 0.02112495  |

mmu-miR-467e-star\_st

110.6878

0.03252307

124.8851

0.004765702

---
